# Supplementary material for: Integrative species delimitation in the common ophiuroid Ophiothrix angulata (Echinodermata: Ophiuroidea): insights from COI, ITS2, arm coloration, and geometric morphometrics
Source: PeerJ. 2023 Jul 17;11:e15655. doi: 10.7717/peerj.15655 (PMC10358340; doi:10.7717/peerj.15655)
Supplement: Supplemental Information 12 — Molecular voucher information and associated GenBank accession numbers for all used specimens. *Depths obtained with relief information in google earth. [file peerj-11-15655-s012.xlsx]

## Sheet: Table S1
LABEL	TAXON	CLADE	SUB-CLADE	VOUCHER	ITS GenBank ACCESSION No.	COI GenBank ACCESSION No.	LATITUDE	LONGITUDE	POPULATION	LOCALITY SHORT NAME	LOCALITY	COUNTRY	HABITAT	DEPTH MIN	DEPTH AVER	DEPTH MAX	COLLECTION DATE (dd/mm/yy)	PHOTOGRAPHY in vivo
QH001	Ophiothrix angulata	Clade 2	A	ICML-UNAM 3.34.110a	-	MT338294	21.4641	-97.2271	SGM	TV	Isla Lobos, Veracruz	MEXICO	Under rock, rocky coral	4.5	5.25	6	2011-03-16	-
QH002	Ophiothrix angulata	Clade 2	A	ICML-UNAM 3.34.110b	-	MT338294	21.4641	-97.2271	SGM	TV	Isla Lobos, Veracruz	MEXICO	Under rock, rocky coral	4.5	5.25	6	2011-03-16	-
QH003	Ophiothrix angulata	Clade 2	A	ICML-UNAM 3.34.110c	-	MT338362	21.4641	-97.2271	SGM	TV	Isla Lobos, Veracruz	MEXICO	Under rock, rocky coral	4.5	5.25	6	2011-03-16	-
QH004	Ophiothrix angulata	Clade 2	A	ICML-UNAM3.34.110d	-	MT338294	21.4641	-97.2271	SGM	TV	Isla Lobos, Veracruz	MEXICO	Under rock, rocky coral	4.5	5.25	6	2011-03-16	-
QH005	Ophiothrix angulata	Clade 2	A	ICML-UNAM3.34.108a	-	MT338294	20.8542	-86.8652	WC	MR	Puerto Morelos, Quintana Roo	MEXICO	Under rock, coral reef	3	3	3	2009-08-03	-
QH007	Ophiothrix angulata	Clade 2	A	ICML-UNAM3.34.108d	-	MT338294	20.8542	-86.8652	WC	MR	Puerto Morelos, Quintana Roo	MEXICO	Under rock, coral reef	3	3	3	2009-08-03	-
QH008	Ophiothrix angulata	Clade 2	A	ICML-UNAM 3.34.114a	-	MT338294	21.4841	-97.2287	SGM	TV	Isla Lobos, Veracruz	MEXICO	Under rock, rocky coral	6	10	14	2011-03-18	-
QH009	Ophiothrix angulata	Clade 2	A	ICML-UNAM 11060a	-	MT338378	20.393	-87.3113	WC	MR	Akumal, Quintana Roo	MEXICO	Under rock, coral rubble	10	10	10	2012-05-25	-
QH010	Ophiothrix angulata	Clade 2	A	ICML-UNAM 11060b	-	MT338294	20.393	-87.3113	WC	MR	Akumal, Quintana Roo	MEXICO	Under rock, coral rubble	10	10	10	2012-05-25	-
QH012	Ophiothrix angulata	Clade 3	-	UF 10250	-	MT338285	24.7651	-80.7542	FK	FK	Florida Keys, Tennessee Reef, Monroe County, FL	USA	Exposed octocoral reef	6	6	6	2010-05-03	YES
QH014	Ophiothrix angulata	Clade 1	B	UF 7880	-	MT338323	29.1	-83.06	NGM	OS	Cedar Keys, Seahorse Key, FL	USA	Seagrass flat	0.1*	ND	2*	2008-09-19	-
QH015	Ophiothrix angulata	Clade 3	-	UF 13805	-	MT338322	16.1405	-61.782	EC	GU	Guadeloupe Is, Lesser Antilles	GUADELOUPE	-	29	29	29	2012-05-07	-
QH017	Ophiothrix angulata	Clade 2	A	UF 9010	-	MT338294	25.2255	-82.6807	FK	NFK	N of Florida Keys, Moroe County, FL	USA	Spongy bottom	30*	ND	35*	2009-06-09	YES
QH019	Ophiothrix angulata	Clade 3	-	UF 7874	-	MT338322	29.0978	-83.0645	NGM	OS	Cedar Keys, Seahorse Key, FL	USA	-	0.1*	ND	2*	2008-09-19	-
QH039	Ophiothrix angulata	Clade 2	A	UCR 930a	-	MT338294	9.77861	-82.8093	SWC	CR	Cahuita, Provincia Limón	COSTA RICA	Reef lagoon	16*	ND	18*	2012-09-29	-
QH044	Ophiothrix angulata	Clade 2	A	UCR 930b	-	MT338382	9.77861	-82.8093	SWC	CR	Cahuita, Provincia Limón	COSTA RICA	Reef lagoon	16*	ND	18*	2012-09-29	-
QH050	Ophiothrix angulata	Clade 1	B	UF 10829	-	MT338317	28.9203	-83.5053	NGM	OS	Gulf of Mexico, N of St. Petersburg, FL	USA	Sand over hard ground	18.3	19.05	19.8	2011-03-12	YES
QH051	Ophiothrix angulata	Clade 2	A	ICML-UNAM 3.34.109a	-	MT338294	21.4819	-97.228	SGM	TV	Tamiahua, Veracruz	MEXICO	Under rock, coral rubble	6	7	8	2011-03-16	-
QH055	Ophiothrix angulata	Clade 2	A	ICML-UNAM 3.34.114b	-	MT338363	21.4841	-97.2287	SGM	TV	Isla Lobos, Veracruz	MEXICO	Under rock, coral rubble	6	10	14	2011-03-18	-
QH056	Ophiothrix angulata	Clade 2	A	ICML-UNAM 3.34.114c	-	MT338364	21.4841	-97.2287	SGM	TV	Isla Lobos, Veracruz	MEXICO	Under rock, coral rubble	6	10	14	2011-03-18	-
QH057	Ophiothrix angulata	Clade 2	A	ICML-UNAM 3.34.120	-	MT338379	20.4658	-86.9783	WC	MR	Cueva Aerolito, Cozumel	MEXICO	-	9	9	9	2011-07-29	-
QH073	Ophiothrix angulata TPE sp. 2	Clade 1	A	UF 10825	-	MT338316	29.028	-83.5887	NGM	OS	Gulf of Mex, N of St. Petersburg, FL	USA	Fossil patch reefs	18.2	19	19.8	2011-03-12	YES
QH074	Ophiothrix angulata TPE sp. 2	Clade 1	B	UF 11649	-	MT338309	28.603	-84.2658	NGM	NWSP	NNW of St. Petersburg, S of Big Bend area, FL	USA	Sand bottom, rubble w	27.4	27.4	27.4	2012-05-25	YES
QH075	Ophiothrix angulata TPE sp. 1	Clade 1	A	UF 11637	-	MT338308	28.6811	-84.3928	NGM	NWSP	NNW of St. Petersburg, S of Big Bend area, FL	USA	Hard bottom, sponge reef	25.9	28.2	30.5	2012-05-25	YES
QH076	Ophiothrix angulata TPE sp. 1	Clade 1	B	UF 11658	-	MT338311	28.6811	-84.3928	NGM	NWSP	NNW of St. Petersburg, S of Big Bend area, FL	USA	Hard bottom, sponge reef	25.9	28.2	30.5	2012-05-25	-
QH108	Ophiothrix angulata	Clade 2	A	ICML-UNAM 10985	-	MT338365	19.1013	-95.9388	SGM	SV	Isla de En medio, Veracruz	MEXICO		1	1	1	2012-05-19	-
QH111	Ophiothrix angulata	Clade 2	A	ICML-UNAM 3.34.109e	-	MT338294	21.4819	-97.228	SGM	TV	Tamiahua, Veracruz	MEXICO	Under rock, coral rubble	6	7	8	2011-03-16	-
QH116	Ophiothrix angulata	Clade 2	A	ICML-UNAM 10994	-	MT338362	18.6462	-95.0959	SGM	SV	Monte Pío, Veracruz	MEXICO	Under rock, tide pool, rocky area	0.5	0.5	0.5	2012-05-21	-
QH153	Ophiothrix cf. angulata	Clade 2	A	UWF	-	MT338313	28.4833	-84.2667	NGM	NWSP	Florida Middle Grounds, Gulf of Mexico	USA	-	25	32.5	40	1985?	-
QH179	Ophiothrix angulata	Clade 3	-	UF 13784	-	MT338386	16.4557	-61.5345	EC	GU	Guadeloupe Is, Lesser Antilles	GUADELOUPE	-	19	19	19	2012-05-16	-
QH181	Ophiothrix angulata	Clade 3	-	UF 13799	-	MT338397	16.0992	-61.7917	EC	GU	Guadeloupe Is, Lesser Antilles	GUADELOUPE	-	8	8	8	2012-05-11	-
QH183	Ophiothrix angulata	Clade 1	A	UF 11605	-	MT338303	28.4383	-84.2725	NGM	NWSP	NNW of St. Petersburg, S of Big Bend area, FL	USA	Hard bottom, sponge reef, in rocks/rubble	33.5	33.5	33.5	2012-05-23	YES
QH185	Ophiothrix angulata	Clade 3	-	UF 13785	-	MT338387	16.4557	-61.5345	EC	GU	Guadeloupe Is, Lesser Antilles	GUADELOUPE	-	19	19	19	2012-05-16	-
QH186	Ophiothrix angulata	Clade 1	A	UF 11653	-	MT338310	28.4383	-84.2725	NGM	NWSP	NNW of St. Petersburg, S of Big Bend area, FL	USA	Hard bottom, sponge reef, in rocks/rubble	33.5	33.5	33.5	2012-05-23	-
QH187	Ophiothrix angulata	Clade 1	B	UF 11660	-	MT338312	28.603	-84.2658	NGM	NWSP	NNW of St. Petersburg, S of Big Bend area, FL	USA	Sand botoom, rubble w/lots of	27.4	27.4	27.4	2012-05-25	-
QH188	Ophiothrix angulata	Clade 3	-	UF 13794	-	MT338390	16.4331	-61.5487	EC	GU	Guadeloupe Is, Lesser Antilles	GUADELOUPE	-	45	45	45	2012-05-17	-
QH189	Ophiothrix angulata	Clade 1	A	UF 13948	-	MT338326	29.541	-83.546	NGM	OS	off Steinhatchee, FL	USA	Hard bottom	10	11	12	2011-12-06	YES
QH190	Ophiothrix angulata	Clade 1	A	UF 11953	-	MT338327	29.494	-83.581	NGM	OS	off Steinhatchee, FL	USA	Hard bottom	10	11	12	2011-12-06	YES
QH192	Ophiothrix angulata	Clade 3	-	UF 13798	-	MT338396	16.0396	-61.7618	EC	GU	Guadeloupe Is, Lesser Antilles	GUADELOUPE	-	17	17	17	2012-05-10	-
QH197	Ophiothrix angulata	Clade 3	-	UF 13797	-	MT338391	16.4009	-61.5478	EC	GU	Guadeloupe Is, Lesser Antilles	GUADELOUPE	-	135	135	135	2012-05-17	-
QH203	Ophiothrix angulata	Clade 1	A	UF 11606	-	MT338304	28.4383	-84.2725	NGM	NWSP	NNW of St. Petersburg, S of Big Bend area, FL	USA	Hard bottom, sponge reef, in	33.5	33.5	33.5	2012-05-23	YES
QH205	Ophiothrix angulata	Clade 3	-	UF 13793	-	MT338389	16.3644	-61.5297	EC	GU	Guadeloupe Is, Lesser Antilles	GUADELOUPE	-	5	5	5	2012-05-20	-
QH207	Ophiothrix angulata	Clade 3	-	UF 13751	-	MT338394	16.0396	-61.7618	EC	GU	Guadeloupe Is, Lesser Antilles	GUADELOUPE	-	17	17	17	2012-05-10	-
QH208	Ophiothrix angulata	Clade 3	-	UF 13800	-	MT338398	15.9833	-61.718	EC	GU	Guadeloupe Is, Lesser Antilles	GUADELOUPE	-	28	28	28	2012-05-21	-
QH210	Ophiothrix angulata	Clade 1	A	UF 13163	-	MT338325	29.0982	-83.0599	NGM	OS	S side of Seahorse Key, Levy Co., FL	USA	Sea grass and sand flat	0	0.15	0.3	2012-12-13	YES
QH214	Ophiothrix angulata	Clade 2	B	UF 13789	-	MT338388	16.3544	-61.6298	EC	GU	Guadeloupe Is, Lesser Antilles	GUADELOUPE	-	2	2	2	2012-05-23	-
QH215	Ophiothrix angulata	Clade 3	-	UF 13807	-	MT338392	16.4117	-61.5329	EC	GU	Guadeloupe Is, Lesser Antilles	GUADELOUPE	-	4	4	4	2012-05-15	-
QH216	Ophiothrix angulata	Clade 3	-	UF 12771	-	MT338393	16.2919	-61.816	EC	GU	Guadeloupe Is, Lesser Antilles	GUADELOUPE	-	27	27	27	2012-05-12	-
QH218	Ophiothrix angulata	Clade 3	-	UF 13788	-	MT338395	16.0992	-61.7917	EC	GU	Guadeloupe Is, Lesser Antilles	GUADELOUPE	-	8	8	8	2012-05-11	-
QH222	Ophiothrix angulata	Clade 1	A	UF 10823	-	MT338315	28.9203	-83.5053	NGM	OS	N of St. Petersburg, Gulf of Mexico	USA	Sand over hard ground	18.3	19.05	19.8	2011-03-12	YES
QH223	Ophiothrix angulata	Clade 2	B	UF 12782	-	MT338385	16.3046	-61.5448	EC	GU	Guadeloupe Is, Lesser Antilles	GUADELOUPE	-	1	1	1	2012-05-14	-
QH228	Ophiothrix angulata	Clade 1	B	UF 11608	-	MT338305	28.5362	-84.2737	NGM	NWSP	NNW of St. Petersburg, S of Big Bend area, FL	USA	Hard bottom, sponge reef	25.9	26.65	27.4	2012-05-23	YES
QH230	Ophiothrix angulata	Clade 1	A	UF 11584	-	MT338298	27.6813	-83.046	NGM	NSP	NNW of St. Petersburg, S of Big Bend area, FL	USA	Hard bottom, sponge reef	17.6	17.6	17.6	2012-05-22	YES
QH232	Ophiothrix angulata	Clade 1	B	UF 11592	-	MT338299	28.4383	-84.2725	NGM	NWSP	NNW of St. Petersburg, S of Big Bend area, FL	USA	Hard bottom, sponge reef	30.5	30.5	30.5	2012-05-23	YES
QH233	Ophiothrix angulata	Clade 1	A	UF 11595	-	MT338302	28.4383	-84.2725	NGM	NWSP	NNW of St. Petersburg, S of Big Bend area, FL	USA	Hard bottom, sponge reef	30.5	30.5	30.5	2012-05-23	-
QH237	Ophiothrix angulata	Clade 1	A	UF 10779	-	MT338297	26.4102	-82.4034	NGM	SSP	Gulf of Mexico, N of St. Petersburg, FL	USA	Sand bottom	17	17.65	18.3	2011-03-05	YES
QH238	Ophiothrix angulata	Clade 1	A	UF 11621	-	MT338307	28.5567	-84.2745	NGM	NWSP	NNW of St. Petersburg, S of Big Bend area, FL	USA	Hard bottom, sponge reef	25.9	28.2	30.5	2012-05-24	YES
QH241	Ophiothrix angulata	Clade 1	B	UF 10822	-	MT338314	28.9203	-83.5053	NGM	OS	Gulf of Mexico, N of St. Petersburg, FL	USA	Sand over hard ground	18.3	19.05	19.8	2011-03-12	YES
QH244	Ophiothrix angulata	Clade 1	B	ICML-UNAM 18264	-	MT338328	29.5556	-83.6042	NGM	OS	Steinhatchee, FL	USA	Sandy rocky, sponges; inside rhodolites	10	10.2	10.4	2014-04-28	-
QH245	Ophiothrix angulata	Clade 1	A	ICML-UNAM 18265	-	MT338329	29.5556	-83.6042	NGM	OS	Steinhatchee, FL	USA	Sandy rocky, sponges; inside rhodolites	10	10.2	10.4	2014-04-28	-
QH246	Ophiothrix angulata	Clade 1	B	ICML-UNAM 18266	-	MT338330	29.5556	-83.6042	NGM	OS	Steinhatchee, FL	USA	Sandy rocky, sponges; inside rhodolites	10	10.2	10.4	2014-04-28	-
QH247	Ophiothrix angulata	Clade 1	B	ICML-UNAM 18267	-	MT338331	29.5556	-83.6042	NGM	OS	Steinhatchee, FL	USA	Sandy rocky, sponges; inside rhodolites	10	10.2	10.4	2014-04-28	-
QH248	Ophiothrix angulata	Clade 1	C	ICML-UNAM 18268	-	MT338332	29.5556	-83.6042	NGM	OS	Steinhatchee, FL	USA	Sandy rocky, sponges; inside rhodolites	10	10.2	10.4	2014-04-28	-
QH249	Ophiothrix angulata	Clade 1	A	ICML-UNAM 18269	-	MT338333	29.5556	-83.6042	NGM	OS	Steinhatchee, FL	USA	Sandy rocky, sponges; inside rhodolites	10	10.2	10.4	2014-04-28	-
QH250	Ophiothrix angulata	Clade 1	A	ICML-UNAM 18270	-	MT338334	29.5556	-83.6042	nGM	OS	Steinhatchee, FL	USA	Sandy rocky, sponges; inside rhodolites	10	10.2	10.4	2014-04-28	-
QH251	Ophiothrix angulata	Clade 1	A	ICML-UNAM 18271	-	MT338335	29.5556	-83.6042	NGM	OS	Steinhatchee, FL	USA	Sandy rocky, sponges; inside rhodolites	10	10.2	10.4	2014-04-28	-
QH252	Ophiothrix angulata	Clade 1	B	ICML-UNAM 18272	-	MT338336	29.5556	-83.6042	NGM	OS	Steinhatchee, FL	USA	Sandy rocky, sponges; inside rhodolites	10	10.2	10.4	2014-04-28	-
QH253	Ophiothrix angulata	Clade 1	A	ICML-UNAM 18273	-	MT338337	29.5556	-83.6042	NGM	OS	Steinhatchee, FL	USA	Sandy rocky, sponges; inside rhodolites	10	10.2	10.4	2014-04-28	-
QH254	Ophiothrix angulata	Clade 1	B	ICML-UNAM 18274	-	MT338338	29.5556	-83.6042	NGM	OS	Steinhatchee, FL	USA	Sandy rocky, sponges; inside rhodolites	10	10.2	10.4	2014-04-28	-
QH255	Ophiothrix angulata	Clade 1	A	ICML-UNAM 18275	-	MT338339	29.5556	-83.6042	NGM	OS	Steinhatchee, FL	USA	Sandy rocky, sponges; inside rhodolites	10	10.2	10.4	2014-04-28	-
QH256	Ophiothrix angulata	Clade 1	B	ICML-UNAM 18276	-	MT338340	29.5556	-83.6042	NGM	OS	Steinhatchee, FL	USA	Sandy rocky, sponges; inside rhodolites	10	10.2	10.4	2014-04-28	-
QH257	Ophiothrix angulata	Clade 1	A	ICML-UNAM 18277	-	MT338341	29.5556	-83.6042	NGM	OS	Steinhatchee, FL	USA	Sandy rocky, sponges; inside rhodolites	10	10.2	10.4	2014-04-28	-
QH258	Ophiothrix angulata	Clade 1	B	ICML-UNAM 18278	-	MT338342	29.5556	-83.6042	NGM	OS	Steinhatchee, FL	USA	Sandy rocky, sponges; inside rhodolites	10	10.2	10.4	2014-04-28	-
QH259	Ophiothrix angulata	Clade 1	B	ICML-UNAM 18279	-	MT338343	29.5556	-83.6042	NGM	OS	Steinhatchee, FL	USA	Sandy rocky, sponges; inside rhodolites	10	10.2	10.4	2014-04-28	-
QH260	Ophiothrix angulata	Clade 1	B	ICML-UNAM 18280	-	MT338344	29.5556	-83.6042	NGM	OS	Steinhatchee, FL	USA	Sandy rocky, sponges; inside rhodolites	10	10.2	10.4	2014-04-28	-
QH261	Ophiothrix angulata	Clade 1	B	ICML-UNAM 18281	-	MT338345	29.5556	-83.6042	NGM	OS	Steinhatchee, FL	USA	Sandy rocky, sponges; inside rhodolites	10	10.2	10.4	2014-04-28	-
QH262	Ophiothrix angulata	Clade 1	A	ICML-UNAM 18282	-	MT338346	29.5556	-83.6042	NGM	OS	Steinhatchee, FL	USA	Sandy rocky, sponges; inside rhodolites	10	10.2	10.4	2014-04-28	-
QH263	Ophiothrix angulata	Clade 1	A	ICML-UNAM 18283	-	MT338347	29.5556	-83.6042	NGM	OS	Steinhatchee, FL	USA	Sandy rocky, sponges; inside rhodolites	10	10.2	10.4	2014-04-28	-
QH264	Ophiothrix angulata	Clade 1	A	ICML-UNAM 18284	-	MT338348	29.5556	-83.6042	NGM	OS	Steinhatchee, FL	USA	Sandy rocky, sponges; inside rhodolites	10	10.2	10.4	2014-04-28	-
QH265	Ophiothrix angulata	Clade 1	B	ICML-UNAM 18285	-	MT338349	29.5556	-83.6042	NGM	OS	Steinhatchee, FL	USA	Sandy rocky, sponges; inside rhodolites	10	10.2	10.4	2014-04-28	-
QH266	Ophiothrix angulata	Clade 1	A	ICML-UNAM 18286	-	MT338350	29.5556	-83.6042	NGM	OS	Steinhatchee, FL	USA	Sandy rocky, sponges; inside rhodolites	10	10.2	10.4	2014-04-28	-
QH267	Ophiothrix angulata	Clade 1	A	ICML-UNAM 18287	-	MT338351	29.5556	-83.6042	NGM	OS	Steinhatchee, FL	USA	Sandy rocky, sponges; inside rhodolites	10	10.2	10.4	2014-04-28	-
QH268	Ophiothrix angulata	Clade 1	A	ICML-UNAM 18288	-	MT338352	29.5556	-83.6042	NGM	OS	Steinhatchee, FL	USA	Sandy rocky, sponges; inside rhodolites	10	10.2	10.4	2014-04-28	-
QH269	Ophiothrix angulata	Clade 1	C	ICML-UNAM 18289	-	MT338353	29.5556	-83.6042	NGM	OS	Steinhatchee, FL	USA	Sandy rocky, sponges; inside rhodolites	10	10.2	10.4	2014-04-28	-
QH270	Ophiothrix angulata	Clade 1	A	ICML-UNAM 18290	-	MT338354	29.5556	-83.6042	NGM	OS	Steinhatchee, FL	USA	Sandy rocky, sponges; inside rhodolites	10	10.2	10.4	2014-04-28	-
QH271	Ophiothrix angulata	Clade 1	A	ICML-UNAM 18291	-	MT338355	29.5556	-83.6042	NGM	OS	Steinhatchee, FL	USA	Sandy rocky, sponges; inside rhodolites	10	10.2	10.4	2014-04-28	-
QH272	Ophiothrix angulata	Clade 1	A	ICML-UNAM 18292	-	MT338356	29.5556	-83.6042	NGM	OS	Steinhatchee, FL	USA	Sandy rocky, sponges; inside rhodolites	10	10.2	10.4	2014-04-28	-
QH273	Ophiothrix angulata	Clade 1	A	ICML-UNAM 18293	-	MT338357	29.5556	-83.6042	NGM	OS	Steinhatchee, FL	USA	Sandy rocky, sponges; inside rhodolites	10	10.2	10.4	2014-04-28	-
QH274	Ophiothrix angulata	Clade 1	A	ICML-UNAM 18294	-	MT338358	29.5556	-83.6042	NGM	OS	Steinhatchee, FL	USA	Sandy rocky, sponges; inside rhodolites	10	10.2	10.4	2014-04-28	-
QH275	Ophiothrix angulata	Clade 1	A	ICML-UNAM 18295	-	MT338359	29.5556	-83.6042	NGM	OS	Steinhatchee, FL	USA	Sandy rocky, sponges; inside rhodolites	10	10.2	10.4	2014-04-28	-
QH276	Ophiothrix angulata	Clade 1	A	ICML-UNAM 18296	-	MT338360	29.5556	-83.6042	NGM	OS	Steinhatchee, FL	USA	Sandy rocky, sponges; inside rhodolites	10	10.2	10.4	2014-04-28	-
QH277	Ophiothrix angulata	Clade 1	B	ICML-UNAM 18297	-	MT338361	29.5556	-83.6042	NGM	OS	Steinhatchee, FL	USA	Sandy rocky, sponges; inside rhodolites	10	10.2	10.4	2014-04-28	-
QH278	Ophiothrix angulata	Clade 1	A	ICML-UNAM 18298	-	MT338334	29.5556	-83.6042	NGM	OS	Steinhatchee, FL	USA	Sandy rocky, sponges; inside rhodolites	10	10.2	10.4	2014-04-28	-
QH283	Ophiothrix angulata	Clade 1	A	UF 13161	-	MT338324	29.0982	-83.0599	NGM	OS	S side of Seahorse Key, Levy Co., FL	USA	Seagrass and sand flat	0	0.15	0.3	2012-12-13	YES
QH284	Ophiothrix angulata	Clade 1	A	UF 10247	-	MT338287	24.7651	-80.7542	FK	FK	Florida Keys, Tennessee Reef, Monroe County, FL	USA	Exposed octocoral reef - sand / rubble substrate	6	6	6	2010-05-03	YES
QH287	Ophiothrix angulata	Clade 1	B	UF 11593	-	MT338200	28.4383	-84.2725	NGM	NWSP	NNW of St. Petersburg, S of Big Bend area, FL	USA	Hard bottom, sponge reef	33.5	33.5	33.5	2012-05-23	YES
QH288	Ophiothrix angulata	Clade 1	A	UF 11613	-	MT338306	28.5362	-84.2737	NGM	NWSP	NNW of St. Petersburg, S of Big Bend area, FL	USA	Hard bottom, sponge reef	25.9	26.65	27.4	2012-05-23	YES
QH289	Ophiothrix angulata	Clade 1	A	UF 11594	-	MT338301	28.4383	-84.2725	NGM	NWSP	NNW of St. Petersburg, S of Big Bend area, FL	USA	Hard bottom, sponge reef	33.5	33.5	33.5	2012-05-23	-
QH306	Ophiothrix angulata	Clade 2	A	LACM 93-82.5	-	MT338294	16.8	-88.0833	WC	BE	Stann Creek Dist. Belize	BELIZE	Sponge	0.3	0.65	1	1993-06-24	-
QH309	Ophiothrix angulata	Clade 2	A	LACM 93-87.11	-	MT338380	16.8	-88.0833	WC	BE	Stann Creek Dist. Belize	BELIZE	Sponge	0.3	0.65	1	1993-07-28	-
QH310	Ophiothrix angulata	Clade 3	-	LACM 2010-32.3	-	MT338384	12.1985	-69.0792	EC	CU	Leeward Ids, Netherlands Antilles	CURACAO	Habitat Reef, Under rubble on sand	1.5	1.5	1.5	2010-07-03	-
QH311	Ophiothrix angulata	Clade 2	A	LACM 2008-7.2	-	MT338381	16.802	-88.0788	WC	BE	Carrie Bow Cay	BELIZE	Backreef, rubble ridge; Halimeda opuntia	0.3	0.75	1.2	2008-03-01	-
QH326	Ophiothrix angulata	Clade 3	-	COREPY 025a	-	MT338366	22.1206	-91.4064	CB	CAN	Cayo Arenas, Banco de Campeche, south Gulf of Mexico	MEXICO	Under rock	11	11	11	2017-05-22	YES
QH328	Ophiothrix angulata	Clade 3	-	COREPY 081a	-	MT338367	22.11	-91.3784	CB	CAN	Cayo Arenas, Banco de Campeche, south Gulf of Mexico	MEXICO	Under rock	9	9	9	2017-05-25	YES
QH329	Ophiothrix angulata	Clade 3	-	COREPY 081b	-	MT338368	22.11	-91.3784	CB	CAN	Cayo Arenas, Banco de Campeche, south Gulf of Mexico	MEXICO	Under rock	9	9	9	2017-05-25	YES
QH330	Ophiothrix angulata	Clade 2	A	COREPY 207	-	MT338369	20.9586	-92.3044	CB	CAC	Triangulos Oeste, Banco de Campeche, south Gulf of Mexico	MEXICO	Under rock, coral rubble	12	12	12	2017-09-08	-
QH331	Ophiothrix angulata	Clade 3	-	COREPY 455	-	MT338372	20.9553	-92.3109	CB	CAC	Triangulos Oeste, Banco de Campeche, south Gulf of Mexico	MEXICO	Inside Callyspongia vaginalis	16	16	16	2017-09-09	-
QH333	Ophiothrix angulata	Clade 3	-	COREPY 421	-	MT338370	20.4994	-92.2043	CB	CAC	Banco Obispo Norte, Banco de Campeche, south Gulf of Mexico	MEXICO	Under rock	10	10	10	2017-09-13	-
QH335	Ophiothrix angulata	Clade 3	-	COREPY 453	-	MT338371	20.5456	-91.8794	CB	CAC	Banco Nuevo, Banco de Campeche, south Gulf of Mexico	MEXICO	Under rock	22	22	22	2017-09-15	-
QH336	Ophiothrix angulata	Clade 3	-	COREPY 986	-	MT338377	18.6232	-87.722	WC	MH	Mahahual, Quintana Roo	MEXICO	Under rock	10	10	10	2018-03-17	-
QH338	Ophiothrix angulata	Clade 2	A	COREPY 07	-	MT338294	20.2009	-91.9679	CB	CAC	Cayo Arcas, Banco de Campeche, south Gulf of Mexico	MEXICO	On Callyspongia vaginalis	7.7	7.7	7.7	2017-04-01	YES
QH342	Ophiothrix angulata	Clade 3	-	COREPY 714	-	MT338373	22.5856	-89.7428	CB	ALA	Parque Nacional Arrecife Alacranes, Yucatán	MEXICO	Under rock	23	23	23	2016-06-23	YES
QH344	Ophiothrix angulata	Clade 3	-	COREPY 717	-	MT338374	20.1946	-91.9608	CB	CAC	Cayo Arcas, Banco de Campeche, south Gulf of Mexico	MEXICO	Under rock	11	11	11	2018-06-20	YES
QH345	Ophiothrix angulata	Clade 3	-	COREPY 984	-	MT338375	20.2192	-91.97275	CB	CAC	Cayo Arcas, Banco de Campeche, sur del Golfo de Mexico	MEXICO	Under rock	1.6	1.6	1.6	2018-08-19	-
QH346	Ophiothrix angulata	Clade 1	C	COREPY 985	-	MT338376	19.2059	-96.073055	SGM	SV	Arrecife Isla Verde, Sistema Arrecifal Veracruzano, Veracruz	MEXICO	Under rock	9	9	9	2018-08-31	-
QH403	Ophiothrix angulata	Clade 2	A	ICML-UNAM 12835a	-	MT338383	12.1653	-83.0763	SWC	NI	Corn Island	NICARAGUA	-	2.8	2.8	2.8	2016-06-14	-
QH404	Ophiothrix angulata	Clade 2	A	ICML-UNAM 12835b	-	MT338294	12.1653	-83.0763	SWC	NI	Corn Island	NICARAGUA	-	3	3	3	2016-06-14	-
UF_7631	Ophiothrix angulata TPE sp. 3	Clade 1	A	UF 7631	-	MT338318	29.0996	-83.0597	NGM	OS	Cedar Keys, Seahorse Key, FL	USA	Sand flat with seagrass	0	0.5	1	2008-09-19	YES
UF_7632	Ophiothrix angulata	Clade 1	A	UF 7632	-	MT338319	29.0996	-83.0597	NGM	OS	Cedar Keys, Seahorse Key, FL	USA	Sand flat with seagrass	0	0.5	1	2008-09-19	YES
UF_7633	Ophiothrix angulata	Clade 1	A	UF 7633	-	MT338320	29.0996	-83.0597	NGM	OS	Cedar Keys, Seahorse Key, FL	USA	Sand flat with seagrass	0	0.5	1	2008-09-19	YES
UF_7634	Ophiothrix angulata TPE sp. 3	Clade 1	B	UF 7634	-	MT338321	29.0996	-83.0597	NGM	OS	Cedar Keys, Seahorse Key, FL	USA	Sand flat with seagrass	0	0.5	1	2008-09-19	YES
UF_8961	Ophiothrix angulata TPE sp. 3	Clade 1	A	UF 8961	-	MT338289	24.8927	-81.8661	FK	NFK	N of Florida Keys, Florida Bay, FL	USA	Algae and sponge bottom	15	15	15	2009-06-07	YES
UF_8963	Ophiothrix angulata TPE sp. 2	Clade 1	B	UF 8963	-	MT338290	24.8927	-81.8661	FK	NFK	N of Florida Keys, Florida Bay, FL	USA	Algae and sponge bottom	15	15	15	2009-06-07	YES
UF_8971	Ophiothrix angulata TPE sp. 3	Clade 1	A	UF 8971	-	MT338291	24.789	-81.886	FK	NFK	N of Florida Keys, Florida Bay, FL	USA	Spongy bottom, from stinky sponge	15.24	15.24	15.24	2009-06-07	YES
UF_8972	Ophiothrix angulata TPE sp. 2	Clade 1	B	UF 8972	-	MT338292	24.789	-81.886	FK	NFK	N of Florida Keys, Florida Bay, FL	USA	Spongy bottom, from stinky sponge	15.24	15.24	15.24	2009-06-07	YES
UF_8973	Ophiothrix angulata TPE sp. 2	Clade 1	A	UF 8973	-	MT338293	24.789	-81.886	FK	NFK	N of Florida Keys, Florida Bay, FL	USA	Spongy bottom, from stinky sponge	15.24	15.24	15.24	2009-06-07	YES
UF_8974	Ophiothrix angulata	Clade 2	A	UF 8974	-	MT338294	24.789	-81.886	FK	NFK	N of Florida Keys, Florida Bay, FL	USA	Spongy bottom, from stinky sponge	15.24	15.24	15.24	2009-06-07	YES
UF_9013	Ophiothrix angulata TPE sp. 2	Clade 1	B	UF 9013	-	MT338295	25.08	-82.6746	FK	NFK	N of Florida Keys, Florida Bay, Monroe County, FL	USA	White muddy sand and sponges	41.15	41.15	41.15	2009-06-09	YES
UF_9017	Ophiothrix angulata	Clade 2	A	UF 9017	-	MT338296	25.1453	-82.8114	FK	NFK	N of Florida Keys, Florida Bay, Monroe County, FL	USA	-	42	42.35	42.7	2009-06-09	YES
UF_10248	Ophiothrix angulata TPE sp. 1	Clade 2	A	UF 10248	-	MT338288	24.8164	-80.8702	FK	FK	Florida Keys, Old Sweat Bank, Monroe County, FL	USA	-	1	1	1	2010-05-02	YES
UF_10276	Ophiothrix angulata TPE sp. 1	Clade 2	A	UF 10276	-	MT338286	24.7651	-80.7542	FK	FK	Florida Keys, Tennessee Reef, Monroe County, FL	USA	Exposed octocoral reef - sand / rubble substrate	6	6	6	2010-05-03	YES
G1066A	Ophiothrix angulata	Clade 1	B	UF 10867	OQ225482	ON245096	30.3222	-81.2865	EF	JA	off Jacksonville, Duval County, FL	USA	-	16.5	18.7	20.9	2010-03-30	-
G1068	Ophiothrix angulata	Clade 3	-	UF 11852	OQ225481	ON245095	18.118	-63.056	EC	StM	Creole Rock, St. Martin	FRENCH ANTILLES	Reef, in Verongida	3.04	6.09	9.14	2012-04-18	-
G1069	Ophiothrix angulata	Clade 3	-	UF 16340	-	ON245094	28.1	-91.0368	NGM	LU	Near Louisiana, northern Gulf of Mexico, Louisiana	USA	Rubble	53	53.5	54	2012-08-26	-
G1073	Ophiothrix angulata	Clade 3	-	UF 16896	OQ225480	ON245093	6.4725	-52.4336	EC	FG	Shelf off French Guiana	FRENCH GUIANA	-	93	94	95	2014-08-04	YES
G1076	Ophiothrix angulata	Clade 3	-	UF 16993	OQ225479	ON245092	6.0235	-52.2561	EC	FG	Shelf off French Guiana	FRENCH GUIANA	-	66	66.5	67	2014-08-08	YES
G1077	Ophiothrix angulata	Clade 1	B	UF 17827	OQ225478	ON245091	29.669	-81.2148	EF	JA	Marineland Marina, Flagler County, FL	USA	Dock fouling community	0	0.5	1	2016-04-06	YES
G1078	Ophiothrix angulata	Clade 1	B	UF 18970	OQ225477	ON245090	29.6701	-81.216	EF	JA	Whitney Marine Laboratory, oyster cage off dock, Flagler County, FL	USA	Oyster cage over grown and teeming with life	1	2.5	4	2017-06-19	-
G1079	Ophiothrix sp.	Clade 1	B	UF 18971	OQ225476	ON245089	29.6701	-81.216	EF	JA	Whitney Marine Laboratory, oyster cage off dock, Flagler County, FL	USA	Oyster cage over grown and teeming with life	2	3.5	5	2017-06-20	-
G1080	Ophiothrix sp.	Clade 2	A	UF 19463	OQ225473	ON245088	9.2958	-82.3463	SWC	PA	Almirante, Bocas del Toro Province	PANAMA	Mangroves	3*	ND	4*	2017-05-30	YES
G1081	Ophiothrix angulata	Clade 2	A	UF 19527	OQ225475	ON245087	9.3471	-82.2568	SWC	PA	Runway, Bocas del Toro Province	PANAMA	Mangroves	0.1*	ND	2*	2017-06-08	-
G1082	Ophiothrix angulata	Clade 2	A	UF 19447A	OQ225474	ON245087	9.2958	-82.3463	SWC	PA	Almirante, Bocas del Toro Province	PANAMA	Mangroves	3*	ND	4*	2017-05-30	-
G1083	Ophiothrix angulata	Clade 2	A	UF 19447B	OQ225473	ON245086	9.2958	-82.3463	SWC	PA	Almirante, Bocas del Toro Province	PANAMA	Mangroves	3*	ND	4*	2017-05-30	-
G1084	Ophiothrix angulata	Clade 2	A	UF 19447C	OQ225473	ON245085	9.2958	-82.3463	SWC	PA	Almirante, Bocas del Toro Province	PANAMA	Mangroves	3*	ND	4*	2017-05-30	-
G1085	Ophiothrix angulata	Clade 2	A	UF 19447D	OQ225473	ON245084	9.2958	-82.3463	SWC	PA	Almirante, Bocas del Toro Province	PANAMA	Mangroves	3*	ND	4*	2017-05-30	-
G1086	Ophiothrix angulata	Clade 2	A	UF 19447E	OQ225473	ON245087	9.2958	-82.3463	SWC	PA	Almirante, Bocas del Toro Province	PANAMA	Mangroves	3*	ND	4*	2017-05-30	-
KC626245	Ophiothrix angulata	Clade 2	A	ICML-UNAM 3.34.117	-	KC626245	20.465	-86.978	WC	MR	Cueva Aerolito de Paraiso, Cozumel Island, Quintana Roo	MEXICO	-	11.1	11.1	11.1	2011-07-26	-
KC626246	Ophiothrix angulata	Clade 2	A	-	-	KC626246	20.465	-86.978	WC	MR	Cueva Aerolito de Paraiso, Cozumel Island, Quintana Roo	MEXICO	-	12	12	12	2011-07-30	-
KC626247	Ophiothrix angulata	Clade 2	A	-	-	KC626247	20.465	-86.978	WC	MR	Cueva Aerolito de Paraiso, Cozumel Island, Quintana Roo	MEXICO	-	12	12	12	2011-07-30	-
KC626248	Ophiothrix angulata	Clade 2	A	-	-	KC626248	20.465	-86.978	WC	MR	Cueva Aerolito de Paraiso, Cozumel Island, Quintana Roo	MEXICO	-	9	9	9	2011-07-29	-
KC626249	Ophiothrix angulata	Clade 2	A	ICML-UNAM 3.34.117	-	KC626249	20.465	-86.978	WC	MR	Cueva Aerolito de Paraiso, Cozumel Island, Quintana Roo	MEXICO	-	11.1	11.1	11.1	2011-07-26	-
KC626250	Ophiothrix angulata	Clade 2	A	-	-	KC626250	20.465	-86.978	WC	MR	Cueva Aerolito de Paraiso, Cozumel Island, Quintana Roo	MEXICO	-	12	12	12	2011-07-30	-
KC626251	Ophiothrix angulata	Clade 2	A	-	-	KC626251	20.441	-86.997	WC	MR	on front Money Bar, Cozumel Island, Quintana Roo	MEXICO	-	3.9	3.9	3.9	2011-07-29	-
KC626252	Ophiothrix angulata	Clade 2	A	ICML-UNAM 3.34.119	-	KC626252	20.4413	-86.9966	WC	MR	on front Money Bar, Cozumel Island, Quintana Roo	MEXICO	-	11.1	11.1	11.1	2011-07-26	-
KC626253	Ophiothrix angulata	Clade 2	A	ICML-UNAM 3.34.119	-	KC626253	20.4413	-86.9966	WC	MR	on front Money Bar, Cozumel Island, Quintana Roo	MEXICO	-	11.1	11.1	11.1	2011-07-26	-
KC626254	Ophiothrix cf. angulata	Clade 3	-	-	-	KC626254	20.465	-86.978	WC	MR	on front Money Bar, Cozumel Island, Quintana Roo	MEXICO	-	9	9	9	2011-07-30	-
KU895443	Ophiothrix angulata	Clade 2	A	-	-	KU895443	26.7835	-80.0475	EF	PB	Blue Heron Bridge, Palm Beach, FL	USA	-	1	1	1	-	-
KU895444	Ophiothrix angulata	Clade 2	A	-	-	KU895444	26.7835	-80.0475	EF	PB	Blue Heron Bridge, Palm Beach, FL	USA	-	1	1	1	-	-
UCR928	Ophiothrix cimar	out-group	-	UCR 928	-	MT344069	9.77861	-82.8093	-	-	Parque Nacional Cahuita, Talamanca, Limón	COSTA RICA	Cresta arrecifal	2	6	10	2012-09-28	-
UF7818	Ophiothrix lineata	out-group	-	UF 7818	-	KU895447	ND	ND	-	-	Little Duck Key, Boat Ramp on right just W of 7 mile bridge (Gulf side), FL	USA	Sea grass, slime	0	1	2	2008-09-06	-
EF053424	Ophiothrix lineata	out-group	-	EF 053424	-	EF053424	-	-	-	-	-	-	-	ND	ND	ND	-	-
EF053425	Ophiothrix lineata	out-group	-	EF 053425	-	EF053425	-	-	-	-	-	-	-	ND	ND	ND	-	-
USNM_1073476	Ophiothrix stri	out-group	-	USNM 1073476	-	MT344068	9.3442	-82.1719	-	-	Bastimento Island, Wild Cane Key, north side of island, Bocas del Toro, Panama	PANAMA	Reef and carbonate rock platform	0.9	2.55	4.2	2003-08-04	-
UF13759	Ophiothrix suensoni	out-group	-	UF 13759	-	MT344067	16.3817	-61.7656	-	-	Téte á l'Anglais, Lesser Antilles, Guadeloupe	GUADELOUPE	-	23	23	23	2012-05-08	-
LK026603	Ophiothrix suensoni	out-group	-	LK 026603	-	LK026603	-	-	-	-	-	-	-	ND	ND	ND	-	-
KU895446	Ophiothrix suensoni	out-group	-	KU 895446	-	KU895446	-	-	-	-	-	-	-	ND	ND	ND	-	-
KU895148	Ophiactis savignyi	out-group	-	KU 895148	-	KU895148	-	-	-	-	-	-	-	ND	ND	ND	-	-

## Sheet: Hoja1
ALA	Alacranes Reef
BE	Belize
CAC	Cayo Arcas
CAN	Cayo Arenas
CR	Costa Rica
CU	Curaçao
FG	French Guiana
FK	Florida Keys
GU	Guadeloupe
JA	Near Jacksonville
LU	Near Louisiana
MH	Mahahual
MR	Mayan Riviera
NFK	North of Florida Keys
NI	Nicaragua
NSP	North of St. Petersburg
NWSP	Northwest of St. Petersburg
OS	off Steinhatchee, North of St. Petersburg and Cedar Key
PA	Panama
PB	Palm Beach
SSP	South of St. Petersburg
StM	St. Martin
SV	Sistema Arrecifal Veracruzano and Monte Pio
TV	Tuxpan Veracruz
