# Supplementary material for: Integrative species delimitation in the common ophiuroid Ophiothrix angulata (Echinodermata: Ophiuroidea): insights from COI, ITS2, arm coloration, and geometric morphometrics
Source: PeerJ. 2023 Jul 17;11:e15655. doi: 10.7717/peerj.15655 (PMC10358340; doi:10.7717/peerj.15655)
Supplement: Supplemental Information 13 — Genetic morphometric analysis voucher information. [file peerj-11-15655-s013.xlsx]

## Sheet: Table S2
TAXON IDENTIFICATION	ARM PLATE	Clade	CATALOG NUMBER	TIFF IMAGE NAME	COMMENTS
Ophiothrix angulata TPE sp. 3	Dorsal	Clade 1 A	UF7631	UF7631_dx1a
Ophiothrix angulata	Dorsal	Clade 1 A	UF7633	UF7633_dx1a
Ophiothrix angulata	Dorsal	Clade 1 A	UF11605	UF11605_dx1a
Ophiothrix angulata	Dorsal	Clade 1 A	UF10823	UF10823_dx1a
Ophiothrix angulata	Dorsal	Clade 1 A	UF11621	UF11621_dx1a
Ophiothrix angulata	Dorsal	Clade 1 A	ICML-UNAM18269	ICML18269_dx1a	REMOVED FROM ANALYSIS
Ophiothrix angulata	Dorsal	Clade 1 A	ICML-UNAM18275	ICML18275_dx1a
Ophiothrix angulata	Dorsal	Clade 1 A	ICML-UNAM18283	ICML18283_dx1a
Ophiothrix angulata	Dorsal	Clade 1 A	ICML-UNAM18291	ICML18291_dx1a	REMOVED FROM ANALYSIS
Ophiothrix angulata	Dorsal	Clade 1 A	ICML-UNAM18292	ICML18292_dx1a
Ophiothrix angulata	Dorsal	Clade 1 A	ICML-UNAM18293	ICML18293_dx1a
Ophiothrix angulata	Dorsal	Clade 1 A	ICML-UNAM18296	ICML18296_dx1a
Ophiothrix angulata	Dorsal	Clade 1 A	ICML-UNAM18298	ICML18298_dx1a
Ophiothrix angulata TPE sp. 2	Dorsal	Clade 1 B	UF8963	UF8963_dx1b	REMOVED FROM ANALYSIS
Ophiothrix angulata	Dorsal	Clade 1 B	ICML-UNAM18264	ICML18264_dx1b
Ophiothrix angulata	Dorsal	Clade 1 B	ICML-UNAM18266	ICML18266_dx1b
Ophiothrix angulata	Dorsal	Clade 1 B	ICML-UNAM18267	ICML18267_dx1b
Ophiothrix angulata	Dorsal	Clade 1 B	ICML-UNAM18272	ICML18272_dx1b
Ophiothrix angulata	Dorsal	Clade 1 B	ICML-UNAM18276	ICML18276_dx1b
Ophiothrix angulata	Dorsal	Clade 1 B	ICML-UNAM18279	ICML18279_dx1b
Ophiothrix angulata	Dorsal	Clade 1 B	ICML-UNAM18280	ICML18280_dx1b
Ophiothrix angulata	Dorsal	Clade 1 B	ICML-UNAM18281	ICML18281_dx1b
Ophiothrix angulata	Dorsal	Clade 1 B	ICML-UNAM18285	ICML18285_dx1b
Ophiothrix angulata	Dorsal	Clade 1 B	ICML-UNAM18297	ICML18297_dx1b
Ophiothrix angulata	Dorsal	Clade 2 A	UF8974	UF8974_dx2
Ophiothrix angulata	Dorsal	Clade 2 A	UF9010	UF9010_dx2
Ophiothrix angulata TPE sp. 1	Dorsal	Clade 2 A	UF10248	UF10248_dx2
Ophiothrix angulata	Dorsal	Clade 2 A	ICML-UNAM10985	ICML10985_dx2
Ophiothrix angulata	Dorsal	Clade 2 A	ICML-UNAM10994	ICML10994_dx2
Ophiothrix angulata	Dorsal	Clade 2 A	ICML-UNAM11060a	ICML11060a_dx2
Ophiothrix angulata	Dorsal	Clade 2 A	ICML-UNAM3.34.108d	ICML3.34.108d_dx2
Ophiothrix angulata	Dorsal	Clade 2 A	ICML-UNAM3.34.109e	ICML3.34.109e_dx2
Ophiothrix angulata	Dorsal	Clade 2 A	ICML-UNAM3.34.110b	ICML3.34.110b_dx2
Ophiothrix angulata	Dorsal	Clade 2 A	ICML-UNAM3.34.114b	ICML3.34.114b_dx2
Ophiothrix angulata	Dorsal	Clade 2 A	ICML-UNAM3.34.117	ICML3.34.117_dx2	REMOVED FROM ANALYSIS
Ophiothrix angulata	Dorsal	Clade 2 A	ICML-UNAM3.34.120	ICML3.34.120_dx2
Ophiothrix angulata	Dorsal	Clade 3	UF7874	UF7874_dx3
Ophiothrix angulata	Dorsal	Clade 3	UF12771	UF12771_dx3	REMOVED FROM ANALYSIS
Ophiothrix angulata	Dorsal	Clade 3	UF13800	UF13800_dx3
Ophiothrix angulata	Dorsal	Clade 3	UF13805	UF13805_dx3
Ophiothrix angulata	Dorsal	Clade 3	UF13807	UF13807_dx3	REMOVED FROM ANALYSIS
Ophiothrix angulata	Dorsal	Clade 3	UF13751	UF13751_dx3
Ophiothrix angulata	Dorsal	Clade 3	UF13784	UF13784_dx3
Ophiothrix angulata	Dorsal	Clade 3	UF13785	UF13785_dx3
Ophiothrix angulata	Dorsal	Clade 3	UF13788	UF13788_dx3
Ophiothrix angulata	Dorsal	Clade 3	UF13793	UF13793_dx3
Ophiothrix angulata	Dorsal	Clade 3	UF13794	UF13794_dx3
Ophiothrix angulata	Dorsal	Clade 3	UF13797	UF13797_dx3
Ophiothrix angulata	Dorsal	Clade 3	UF13798	UF13798_dx3
Ophiothrix angulata	Dorsal	Clade 3	UF13799	UF13799_dx3
Ophiothrix angulata TPE sp. 3	Ventral	Clade 1 A	UF7631	UF7631_vx1a
Ophiothrix angulata	Ventral	Clade 1 A	UF7633	UF7633_vx1a
Ophiothrix angulata	Ventral	Clade 1 A	UF11605	UF11605_vx1a
Ophiothrix angulata	Ventral	Clade 1 A	UF10823	UF10823_vx1a
Ophiothrix angulata	Ventral	Clade 1 A	UF11621	UF11621_vx1a
Ophiothrix angulata	Ventral	Clade 1 A	ICML-UNAM18269	ICML18269_vx1a	REMOVED FROM ANALYSIS
Ophiothrix angulata	Ventral	Clade 1 A	ICML-UNAM18275	ICML18275_vx1a
Ophiothrix angulata	Ventral	Clade 1 A	ICML-UNAM18283	ICML18283_vx1a
Ophiothrix angulata	Ventral	Clade 1 A	ICML-UNAM18291	ICML18291_vx1a
Ophiothrix angulata	Ventral	Clade 1 A	ICML-UNAM18292	ICML18292_vx1a
Ophiothrix angulata	Ventral	Clade 1 A	ICML-UNAM18293	ICML18293_vx1a
Ophiothrix angulata	Ventral	Clade 1 A	ICML-UNAM18296	ICML18296_vx1a
Ophiothrix angulata	Ventral	Clade 1 A	ICML-UNAM18298	ICML18298_vx1a
Ophiothrix angulata TPE sp. 2	Ventral	Clade 1 B	UF8963	UF8963_vx1b	REMOVED FROM ANALYSIS
Ophiothrix angulata	Ventral	Clade 1 B	ICML-UNAM18264	ICML18264_vx1b
Ophiothrix angulata	Ventral	Clade 1 B	ICML-UNAM18266	ICML18266_vx1b
Ophiothrix angulata	Ventral	Clade 1 B	ICML-UNAM18267	ICML18267_vx1b	REMOVED FROM ANALYSIS
Ophiothrix angulata	Ventral	Clade 1 B	ICML-UNAM18272	ICML18272_vx1b
Ophiothrix angulata	Ventral	Clade 1 B	ICML-UNAM18276	ICML18276_vx1b
Ophiothrix angulata	Ventral	Clade 1 B	ICML-UNAM18279	ICML18279_vx1b
Ophiothrix angulata	Ventral	Clade 1 B	ICML-UNAM18280	ICML18280_vx1b
Ophiothrix angulata	Ventral	Clade 1 B	ICML-UNAM18281	ICML18281_vx1b
Ophiothrix angulata	Ventral	Clade 1 B	ICML-UNAM18285	ICML18285_vx1b
Ophiothrix angulata	Ventral	Clade 1 B	ICML-UNAM18297	ICML18297_vx1b
Ophiothrix angulata	Ventral	Clade 2 A	UF8974	UF8974_vx2
Ophiothrix angulata	Ventral	Clade 2 A	UF9010	UF9010_vx2
Ophiothrix angulata TPE sp. 1	Ventral	Clade 2 A	UF10248	UF10248_vx2
Ophiothrix angulata	Ventral	Clade 2 A	ICML-UNAM10985	ICML10985_vx2
Ophiothrix angulata	Ventral	Clade 2 A	ICML-UNAM10994	ICML10994_vx2
Ophiothrix angulata	Ventral	Clade 2 A	ICML-UNAM11060a	ICML11060a_vx2	REMOVED FROM ANALYSIS
Ophiothrix angulata	Ventral	Clade 2 A	ICML-UNAM3.34.108d	ICML3.34.108d_vx2
Ophiothrix angulata	Ventral	Clade 2 A	ICML-UNAM3.34.109e	ICML3.34.109e_vx2
Ophiothrix angulata	Ventral	Clade 2 A	ICML-UNAM3.34.110b	ICML3.34.110b_vx2
Ophiothrix angulata	Ventral	Clade 2 A	ICML-UNAM3.34.114b	ICML3.34.114b_vx2
Ophiothrix angulata	Ventral	Clade 2 A	ICML-UNAM3.34.117	ICML3.34.117_vx2	REMOVED FROM ANALYSIS
Ophiothrix angulata	Ventral	Clade 2 A	ICML-UNAM3.34.120	ICML3.34.120_vx2
Ophiothrix angulata	Ventral	Clade 3	UF7874	UF7874_vx3
Ophiothrix angulata	Ventral	Clade 3	UF12771	UF12771_vx3
Ophiothrix angulata	Ventral	Clade 3	UF13800	UF13800_vx3
Ophiothrix angulata	Ventral	Clade 3	UF13805	UF13805_vx3
Ophiothrix angulata	Ventral	Clade 3	UF13807	UF13807_vx3	REMOVED FROM ANALYSIS
Ophiothrix angulata	Ventral	Clade 3	UF13751	UF13751_vx3
Ophiothrix angulata	Ventral	Clade 3	UF13784	UF13784_vx3
Ophiothrix angulata	Ventral	Clade 3	UF13785	UF13785_vx3
Ophiothrix angulata	Ventral	Clade 3	UF13788	UF13788_vx3
Ophiothrix angulata	Ventral	Clade 3	UF13793	UF13793_vx3	REMOVED FROM ANALYSIS
Ophiothrix angulata	Ventral	Clade 3	UF13794	UF13794_vx3
Ophiothrix angulata	Ventral	Clade 3	UF13797	UF13797_vx3
Ophiothrix angulata	Ventral	Clade 3	UF13798	UF13798_vx3
Ophiothrix angulata	Ventral	Clade 3	UF13799	UF13799_vx3
