# Supplementary material for: Integrative species delimitation in the common ophiuroid Ophiothrix angulata (Echinodermata: Ophiuroidea): insights from COI, ITS2, arm coloration, and geometric morphometrics
Source: PeerJ. 2023 Jul 17;11:e15655. doi: 10.7717/peerj.15655 (PMC10358340; doi:10.7717/peerj.15655)
Supplement: Supplemental Information 14 — P-values associated with pairwise Procrustes distances between the mean shapes of dorsal arm plate (up) and ventral arm plate (below) of Ophiothrix angulata from the subclades 1A, 1B, 2A, and Clade 3. Significance levels: *P < 0.05, **P < 0.005. [file peerj-11-15655-s014.xlsx]

## Sheet: Table S3
Analysis Dorsal Arm Plate	Clade 1 A	Clade 1 B	Clade 2 A	Clade 3
Clade 1 A						*=<.05
Clade 1 B	0.894					**=<.005
Clade 2 A	0.745	0.507
Clade 3	*	*	**
Analysis Ventral Arm Plate	Clade 1 A	Clade 1 B	Clade 2 A	Clade 3
Clade 1 A
Clade 1 B	0.563
Clade 2 A	0.349	0.309
Clade 3	**	**	**
