# Supplementary material for: Integrative species delimitation in the common ophiuroid Ophiothrix angulata (Echinodermata: Ophiuroidea): insights from COI, ITS2, arm coloration, and geometric morphometrics
Source: PeerJ. 2023 Jul 17;11:e15655. doi: 10.7717/peerj.15655 (PMC10358340; doi:10.7717/peerj.15655)
Supplement: Supplemental Information 17 [file peerj-11-15655-s017.xlsx]

## Sheet: PCscores
Voucher	Clade	PC1_DAP	PC2_DAP	PC1_VAP	PC2_VAP
UF7874	Clade 3	-0.0701147	-0.0162558	-0.0217568	-0.0156956
UF12771	Clade 3	ND	ND	-0.0759184	0.027319
UF13784	Clade 3	0.0160021	0.0968328	-0.0315865	-0.000417548
UF13785	Clade 3	-0.0825937	-0.00432562	-0.1650995975	0.00281645
UF13793	Clade 3	-0.0643646	-0.0313026	ND	ND
UF13794	Clade 3	-0.0918593	0.00176043	-0.0706032	-0.0215162
UF13797	Clade 3	-0.0588936	0.0281737	-0.13401	-0.00583077
UF13751	Clade 3	-0.121637	0.00884812	-0.166015	0.0128405
UF13788	Clade 3	0.0492129	0.0384224	-0.030728	0.0394924
UF13798	Clade 3	-0.0540392	-0.0298941	-0.106827	-0.0226769
UF13799	Clade 3	-0.0838585	0.0253401	-0.124611	0.0228401
UF13800	Clade 3	0.0251141	0.00396451	-0.0648844	-0.0165504
UF13805	Clade 3	-0.0817385	0.0159189	-0.13036	-0.0415794
UF10248	Clade 2A	-0.00687332	-0.0310676	0.0171797	0.0143186
UF8974	Clade 2A	-0.114449	-0.0369387	-0.0524555	0.0205225
UF9010	Clade 2A	0.0408261	0.0194486	0.0774625	0.00724592
ICML3_34_108d	Clade 2A	0.0461467	0.0115996	0.0219784	0.00229236
ICML3_34_109e	Clade 2A	0.0152756	0.0559347	0.0671079	0.0450828
ICML3_34_110b	Clade 2A	0.0574081	0.00770758	0.0390533	0.035318
ICML3_34_114b	Clade 2A	0.0877703	-0.0426867	0.0726655	-0.0463173
ICML10985	Clade 2A	0.0722967	-0.0113197	0.0468648	0.0204117
ICML10994	Clade 2A	0.073726	0.0518236	0.0458384	0.0296097
ICML11060a	Clade 2A	-0.0533073	0.00205118	ND	ND
ICML3_34_120	Clade 2A	0.0196961	-0.0351408	0.000365289	0.0231958
UF7631	Clade 1A	-0.0223133	-0.00273737	0.0489556	-0.0443127
UF7633	Clade 1A	-0.0596268	0.0380255	0.0231528	0.0390616
UF11605	Clade 1A	-0.00740328	-0.0181277	-0.00491931	-0.0197862
UF11621	Clade 1A	0.159763	-0.0202533	0.0463303	0.0198698
UF10823	Clade 1A	0.0490315	-0.0494161	0.0519973	0.00835209
ICML18275	Clade 1A	0.000399529	0.0229144	0.0404187	-0.00348453
ICML18283	Clade 1A	0.026765	0.0309292	0.0686995	-0.023579
ICML18291	Clade 1A	ND	ND	0.05648	0.0300408
ICML18292	Clade 1A	0.00171721	0.0147495	0.0454493	0.00698822
ICML18293	Clade 1A	0.0269775	-0.0119219	0.0779705	-0.0477965
ICML18296	Clade 1A	-0.030881	0.00374733	0.0302491	-0.0317936
ICML18298	Clade 1A	0.0287923	-0.00585575	0.0263073	-0.0117892
ICML18264	Clade 1B	0.079542	-0.000617468	0.0740245	-0.0239833
ICML18266	Clade 1B	-0.0137398	-0.0412981	0.00874138	-0.0192952
ICML18267	Clade 1B	-0.0198473	-0.0328542	ND	ND
ICML18276	Clade 1B	0.0678312	0.000449257	0.0523486	-0.00427252
ICML18279	Clade 1B	0.00774705	0.0114482	-0.00801277	0.0111018
ICML18280	Clade 1B	0.0212468	-0.0210819	0.0339821	-0.0610925
ICML18281	Clade 1B	0.00245013	-0.00632368	0.00601448	0.0114185
ICML18285	Clade 1B	0.0333789	-0.00601443	0.0134644	0.0154771
ICML18297	Clade 1B	-0.0869838	-0.0147393	-0.0263854	-0.00456915
